# Supplementary material
Source: Springer Nature journal article supplement (https://www.springermedizin.de/resource/supplementary/12916_2009_212_MOESM4_ESM.pdf/9599404)

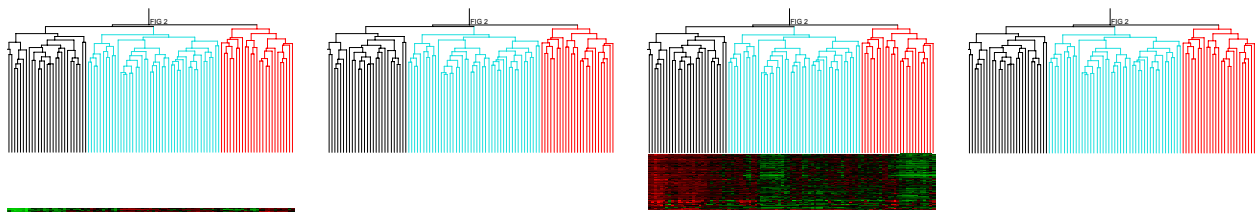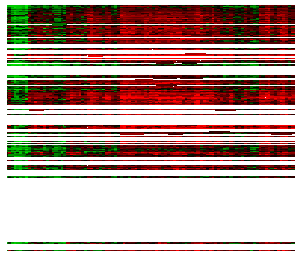

**Cluster 1: 754 genes**

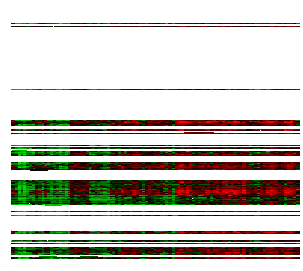

**Cluster 2: 590 genes**

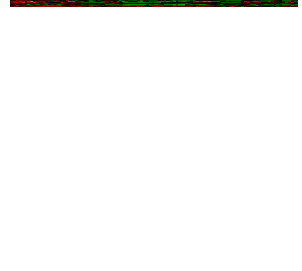

**Cluster 3: 1137 genes**

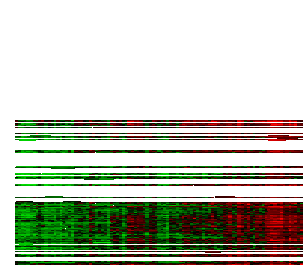

**Cluster 4: 677 genes**

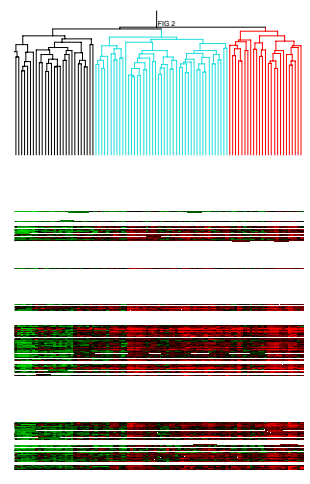

**Cluster 5: 671 genes**

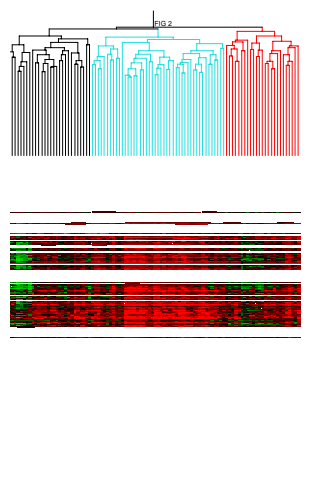

**Cluster 6: 601 genes**

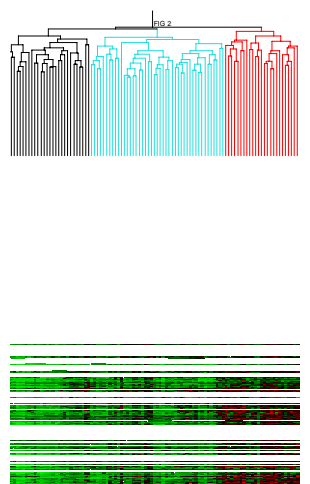

**Cluster 7: 465 genes**

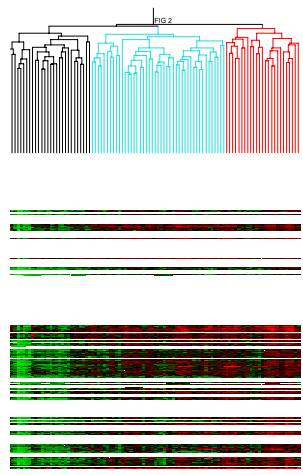

**Cluster 8: 661 genes**

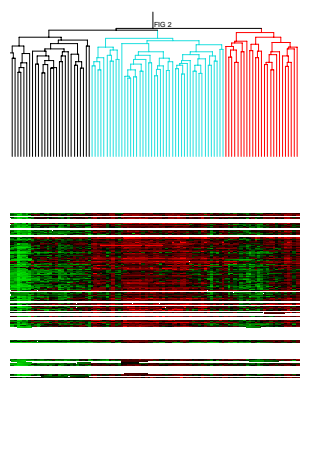

**Cluster 9: 1054 genes**

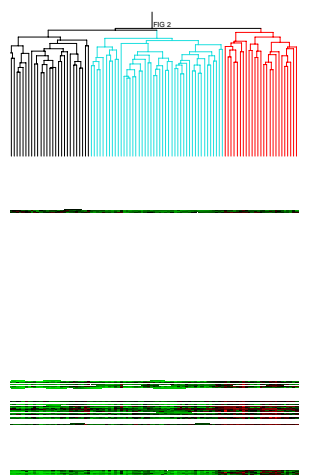

**Cluster 10: 324 genes**

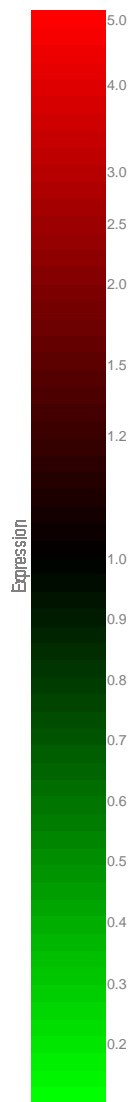

Supplement: MOESM4 [file 9599404]
